## CORRECTION

# Correction: Flight control of fruit flies: dynamic response to optic flow and headwind (doi:10.1242/jeb.153056)

Kiaran K. K. Lawson and Mandyam V. Srinivasan

There was an error published in *J. Exp. Biol.* (2017) **220**, 2005–2016 (doi:10.1242/jeb.153056).

In Materials and Methods, ‘Virtual reality flight platform’, the units for pitch torque were incorrect. The corrected sentence is given below.

Although this configuration cannot separate the thrust force and pitch torque generated by the flies, it was assumed that the pitch torque produced [estimated to be  $3\times$  greater than that of *Drosophila melanogaster* ( $\sim 10^{-2}$  N  $\mu$ m; Sugiura and Dickinson, 2009), or  $\sim 3\times 10^{-2}$  N  $\mu$ m, which translates to a force of  $\sim 3$   $\mu$ N projected onto the transducer] is significantly lower than the mechanically amplified thrust (40–160  $\mu$ N projected onto the transducer, peak-to-peak).

We apologise to the authors and readers for any inconvenience this may have caused.
